# Supplementary material for: Factors Influencing Parental and Individual COVID-19 Vaccine Decision Making in a Pediatric Network
Source: MDPI journal article supplement (doi:10.3390/vaccines10081277), 2022-08-08
Supplement: s1 [file s1]

**Table S1.** Children's Hospital of Philadelphia Outpatient Care Network Patient Demographics, 2022

| CHOP Site Type            | Urban Academic<br>N (%) | Urban Non-Academic<br>N (%) | Suburban<br>N (%) | Total<br>N (%) |
|---------------------------|-------------------------|-----------------------------|-------------------|----------------|
| <b>Gender</b>             |                         |                             |                   |                |
| Female                    | 29,066 (49%)            | 15,234 (49%)                | 94,986 (49%)      | 139,286 (49%)  |
| Male                      | 29,790 (51%)            | 15,893 (51%)                | 99,002 (51%)      | 144,685 (51%)  |
| Unknown                   | 0 (0%)                  | 0 (0%)                      | 3 (0%)            | 3 (0%)         |
| <b>Race</b>               |                         |                             |                   |                |
| White or Caucasian        | 5462 (9%)               | 12,100 (39%)                | 125,915 (65%)     | 143,477 (51%)  |
| Black or African American | 42,416 (72%)            | 13,487 (43%)                | 22,350 (12%)      | 78,253 (28%)   |
| Asian or Pacific Islander | 2732 (5%)               | 1277 (4%)                   | 9941 (5%)         | 13,950 (5%)    |
| Multiple                  | 1355 (2%)               | 1198 (4%)                   | 5927 (3%)         | 8480 (3%)      |
| Other or Unknown          | 6891 (12%)              | 3065 (10%)                  | 29,858 (15%)      | 39,814 (14%)   |
| <b>Ethnicity</b>          |                         |                             |                   |                |
| Hispanic or Latino        | 5092 (9%)               | 2268 (7%)                   | 16,273 (8%)       | 23,633 (8%)    |
| Non-Hispanic or Latino    | 53,591 (91%)            | 28,516 (92%)                | 176,378 (91%)     | 258,485 (91%)  |
| Unknown                   | 173 (0%)                | 343 (1%)                    | 1340 (1%)         | 1856 (1%)      |
| <b>Patient Age</b>        |                         |                             |                   |                |
| < 1 year                  | 9979 (17%)              | 5663 (18%)                  | 28,478 (15%)      | 44,120 (16%)   |
| 1-5 years                 | 16,021 (27%)            | 8297 (27%)                  | 49,147 (25%)      | 73,465 (26%)   |
| 6-8 years                 | 9048 (15%)              | 4125 (13%)                  | 29,053 (15%)      | 42,226 (15%)   |
| 9-12 years                | 11,560 (20%)            | 5538 (18%)                  | 39,053 (20%)      | 56,151 (20%)   |
| 13-17 years               | 10,761 (18%)            | 6218 (20%)                  | 42,219 (22%)      | 59,198 (21%)   |
| 18-19 years               | 1487 (3%)               | 1286 (4%)                   | 6041 (3%)         | 8814 (3%)      |
| <b>Payer</b>              |                         |                             |                   |                |
| Medicaid                  | 43,498 (74%)            | 8648 (28%)                  | 42,268 (22%)      | 94,414 (33%)   |
| Commercial or Other       | 15,296 (26%)            | 22,439 (72%)                | 151,430 (78%)     | 189,165 (67%)  |
| Unknown                   | 62 (0%)                 | 40 (0%)                     | 293 (0%)          | 395 (0%)       |

Source Notes: Academic sites have a higher proportion of uninsured and Medicaid patients, include physicians in training, and use different patient and provider quality metrics compared with the non-academic urban and suburban sites.

**Figure S1.** Sampling Method for Study Recruitment for Parental Vaccine Confidence Survey and Focus Groups from Children’s Hospital of Philadelphia (CHOP) Outpatient Primary Care Network, 2021–2022.

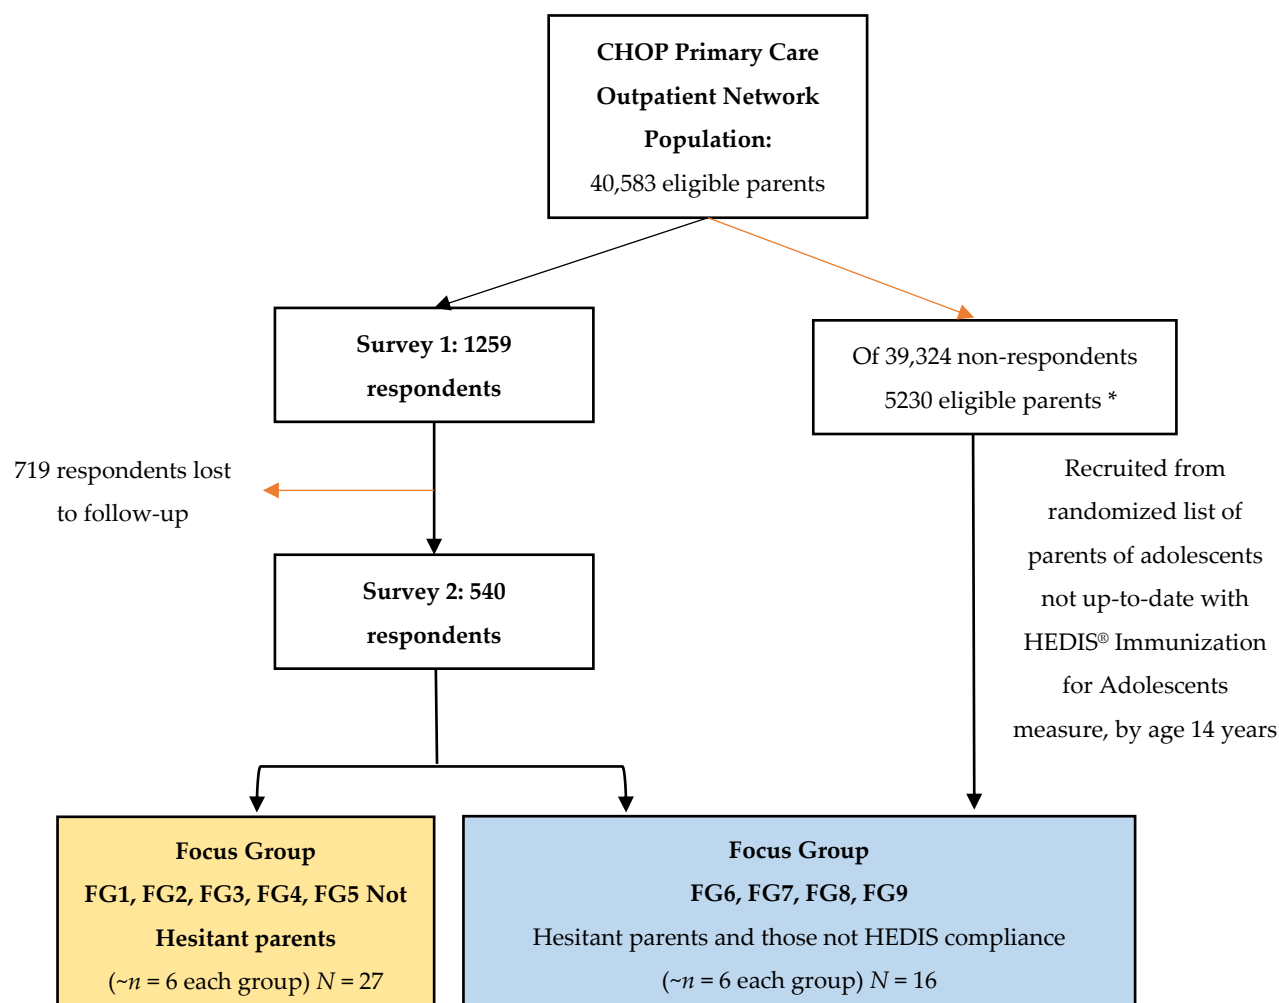

Note: Surveys one and two were conducted from October 12–January 21, 2022 and January 27–February 18, 2022, respectively. The unit of analysis is a parent. HEDIS® = Healthcare Effectiveness Data and Information Set. \* Hesitancy is defined as per Helmkamp, et. al., as measured responses on a 4-point Likert scale (Strongly Disagree, Disagree, Agree, and Strongly Agree) resulting in the following numeric scores: 1, 2, 4, or 5. Some items were reverse-coded so a lower score indicated hesitancy. Hesitancy was defined as a mean score < 3 (the midpoint).[15] One dose of meningococcal vaccine, one tetanus, diphtheria, acellular pertussis (Tdap) or tetanus (TD) vaccine and the complete human papillomavirus vaccine (HPV) series by age 13 years. For the recruitment we extended the age of compliance to 14 years because of delays in care due to the COVID-19 pandemic.
